# Supplementary material for: Evolutionary dynamics of chromatin structure and duplicate gene expression in diploid and allopolyploid cotton
Source: Research Square preprint supplement (doi:10.21203/rs.3.rs-3373364/v1), 2023-10-19
Supplement: Supplementary file 2 [file SuppleTables.xlsx]

## Sheet: TableS1
Supplementary Table 1. Summary of sequencing data in this study
Data Type	Species	Genome	Tissue	SRA ID	Sample	Source
MNase-seq	G. arboreum	A2 cv.101	mature leaf, short day 5pm	SRR8837441	A6H	This study, excluded due to insufficient quality
MNase-seq	G. arboreum	A2 cv.101	mature leaf, short day 5pm	SRR8837432	A6L	This study, excluded due to insufficient quality
MNase-seq	G. arboreum	A2 cv.101	mature leaf, short day 5pm	SRR8837438	A6Hn	This study
MNase-seq	G. arboreum	A2 cv.101	mature leaf, short day 5pm	SRR8837434	A6Ln	This study
MNase-seq	G. raimondii	D5	mature leaf, short day 5pm	SRR8837433	D1H	This study
MNase-seq	G. raimondii	D5	mature leaf, short day 5pm	SRR8837444	D1L	This study
MNase-seq	G. raimondii	D5	mature leaf, short day 5pm	SRR8837443	D2H	This study
MNase-seq	G. raimondii	D5	mature leaf, short day 5pm	SRR8837436	D2L	This study
MNase-seq	G. arboreum x G. raimondii	A2 x D5	mature leaf, short day 5pm	SRR8837435	F2H	This study
MNase-seq	G. arboreum x G. raimondii	A2 x D5	mature leaf, short day 5pm	SRR8837437	F2L	This study
MNase-seq	G. arboreum x G. raimondii	A2 x D5	mature leaf, short day 5pm	SRR8837431	F3H	This study
MNase-seq	G. arboreum x G. raimondii	A2 x D5	mature leaf, short day 5pm	SRR8837442	F3L	This study
MNase-seq	G. hirsutum	AD1 cv. Maxxa	mature leaf, short day 5pm	SRR8837439	M1H	This study
MNase-seq	G. hirsutum	AD1 cv. Maxxa	mature leaf, short day 5pm	SRR8837440	M1L	This study
MNase-seq	G. hirsutum	AD1 cv. Maxxa	mature leaf, short day 5pm	SRR8837445	M2H	This study
MNase-seq	G. hirsutum	AD1 cv. Maxxa	mature leaf, short day 5pm	SRR8837446	M2L	This study
ATAC-seq	G. raimondii	D5	young leaf	SRR26111448-SRR26111451	ATAC-D5_R25	This study
ATAC-seq	G. raimondii	D5	young leaf	SRR26111444-SRR26111447	ATAC-D5_R26	This study
RNA-seq	G. hirsutum	AD1 cv. Maxxa	mature leaf, short day 5pm	SRR8878542	SD5-Maxxa-S1	This study
RNA-seq	G. hirsutum	AD1 cv. Maxxa	mature leaf, short day 5pm	SRR8878545	SD5-Maxxa-S2	This study
RNA-seq	G. hirsutum	AD1 cv. Maxxa	mature leaf, short day 5pm	SRR8878544	SD5-Maxxa-S3	This study
RNA-seq	G. raimondii	D5	mature leaf, short day 5pm	SRR8878511	SD5-D5-S1	This study
RNA-seq	G. raimondii	D5	mature leaf, short day 5pm	SRR8878512	SD5-D5-S2	This study, excluded due to labeling error
RNA-seq	G. raimondii	D5	mature leaf, short day 5pm	SRR8878517	SD5-D5-S3	This study
RNA-seq	G. arboreum	A2 cv.101	mature leaf, short day 5pm	SRR8878808	SD5-A2-S1	This study
RNA-seq	G. arboreum	A2 cv.101	mature leaf, short day 5pm	SRR8878807	SD5-A2-S4	This study
RNA-seq	G. arboreum	A2 cv.101	mature leaf, short day 5pm	SRR8878806	SD5-A2-S5	This study
RNA-seq	G. arboreum x G. raimondii	A2 x D5	mature leaf, short day 5pm	SRR8878805	SD5-A2xD5-S1	This study
RNA-seq	G. arboreum x G. raimondii	A2 x D5	mature leaf, short day 5pm	SRR8878804	SD5-A2xD5-S2	This study
RNA-seq	G. arboreum x G. raimondii	A2 x D5	mature leaf, short day 5pm	SRR8878817	SD5-A2xD5-S3	This study
RNA-seq	G. arboreum	A2 cv. Shixiya	young leaf	SRR5886155	YL-A2-R1	Wang et al., Nat Plants 2018
RNA-seq	G. arboreum	A2 cv. Shixiya	young leaf	SRR5886156	YL-A2-R2	Wang et al., Nat Plants 2018
RNA-seq	G. hirsutum	AD1 cv. TM-1	young leaf	SRR5886146	YL-AD1-R1	Wang et al., Nat Plants 2018
RNA-seq	G. hirsutum	AD1 cv. TM-1	young leaf	SRR5886147	YL-AD2-R2	Wang et al., Nat Plants 2018
RNA-seq	G. raimondii	D5	young leaf	SRR5886148	YL-D5-R1	Wang et al., Nat Plants 2018
RNA-seq	G. raimondii	D5	young leaf	SRR5886149	YL-D5-R2	Wang et al., Nat Plants 2018
DNase-seq	G. arboreum	A2 cv. Shixiya	young leaf	SRR5886142	DNase-A2-1	Wang et al., Nat Plants 2018
DNase-seq	G. arboreum	A2 cv. Shixiya	young leaf	SRR5886143	DNase-A2-2	Wang et al., Nat Plants 2018
DNase-seq	G. raimondii	D5	young leaf	SRR5886144	DNase-D5-1	Wang et al., Nat Plants 2018
DNase-seq	G. raimondii	D5	young leaf	SRR5886145	DNase-D5-2	Wang et al., Nat Plants 2018
DNase-seq	G. hirsutum	AD1 cv. TM-1	young leaf	SRR4996276	DNase-AD1-l	Wang et al., Nat Genet 2017
DNase-seq	G. hirsutum	AD1 cv. TM-1	young leaf	SRR4996279	DNase-AD1-2	Wang et al., Nat Genet 2017
DNase-seq	G. hirsutum	AD1 cv. TM-1	10 dpa fiber	SRR4996281	DNase-AD1-l.fiber	Wang et al., Nat Genet 2017
DNase-seq	G. hirsutum	AD1 cv. TM-1	10 dpa fiber	SRR4996282	DNase-AD1-l.fiber	Wang et al., Nat Genet 2017

## Sheet: TableS2
Supplementary Table 2. Summary of MNase-seq data
Sample	Species/Accession	Digestion	Raw read pairs	Raw read pair per genome gb	Trimmed&filtered	%Trimmed&filtered	Reference genome	Mapped	%Mapped	Mapped(q>20)	%Mapped(q>20)	Covered bases(q>20)	%Covered_b(q>20)
A6H	G. arboreum accession A2-101	heavy	23771680	1.26445e+07	23743097	0.9988	A2_WHU_v1	21761727	0.91655	13911216	0.585906	881608788	0.584161
A6L	G. arboreum accession A2-101	light	187657307	9.98177e+07	187605447	0.9997	A2_WHU_v1	181669915	0.968362	125018023	0.666388	1217758297	0.806896
A6Hn	G. arboreum accession A2-101	heavy	176272405	9.37619e+07	176238604	0.9998	A2_WHU_v1	170991143	0.970225	112339024	0.637426	1237871778	0.820224
A6Ln	G. arboreum accession A2-101	light	203372011	1.08177e+08	203337094	0.9998	A2_WHU_v1	196762367	0.967666	134923568	0.663546	1257459098	0.833203
D1H	G. raimondii	heavy	39623449	4.95293e+07	39607317	0.9996	D5_JGI_v2_a2.1	38647991	0.9758	33967312	0.8576	704408202	0.9402
D1L	G. raimondii	light	21423412	26779265	21403476	0.9991	D5_JGI_v2_a2.1	20226201	0.945	18024273	0.8421	692172201	0.9238
D2H	G. raimondii	heavy	28007378	3.50092e+07	27977896	0.9989	D5_JGI_v2_a2.1	26044246	0.9309	22277062	0.7962	671596277	0.8964
D2L	G. raimondii	light	37099841	4.63748e+07	37078772	0.9994	D5_JGI_v2_a2.1	35760046	0.9644	31783886	0.8572	710231579	0.948
F2H	G. arboreum x G. raimondii	heavy	181146243	6.75919e+07	181037728	0.9994	A2_WHU + D5	176088056	0.972659	120633151	0.666343	1921524507	0.850828
F2L	G. arboreum x G. raimondii	light	108049956	4.03171e+07	107993008	0.9995	A2_WHU + D5	103935054	0.962424	74929428	0.693836	1906631917	0.844234
F3H	G. arboreum x G. raimondii	heavy	117575996	4.38716e+07	117492700	0.9993	A2_WHU + D5	113040149	0.962104	79202661	0.674107	1881244366	0.832993
F3L	G. arboreum x G. raimondii	light	142450981	5.31534e+07	142301848	0.999	A2_WHU + D5	135473407	0.952014	97611627	0.685948	1934467434	0.856559
M1H	G. hirsutum cultivar Acala Maxxa	heavy	184711687	7.69632e+07	184659336	0.9997	AD1_UTX_v2.1	181754507	0.984269	136438688	0.738867	1940299524	0.850405
M1L	G. hirsutum cultivar Acala Maxxa	light	111362027	4.64008e+07	111321708	0.9996	AD1_UTX_v2.1	109453435	0.983217	82792347	0.743721	1917268576	0.840311
M2H	G. hirsutum cultivar Acala Maxxa	heavy	164313999	6.84642e+07	164263036	0.9997	AD1_UTX_v2.1	161767712	0.984809	120851562	0.73572	1933567887	0.847454
M2L	G. hirsutum cultivar Acala Maxxa	light	224928587	9.37202e+07	224840532	0.9996	AD1_UTX_v2.1	221681322	0.985949	166651625	0.741199	1960116618	0.85909
* A6H and A6L were excluded from the following analysis due to poor sequencing quality (insufficient sequencing depth and incorrect fragment size distribution, respectively).

## Sheet: TableS3
Supplementary Table 3. Nucleosome identification and classifcation
Species	G. arboreum accession A2-101	G. raimondii	G. arboreum x G. raimondii		G. hirsutum cultivar Acala Maxxa
(sub)Genome	A2	D5	F1-At	F1-Dt	AD1-At	AD1-Dt
Genome size (bp)	1509187826	749228090	1509187826	749228090	1445290955	836327675
Nuc number	5412105	3129868	5428205	3095634	5264521	3200097
W	1669806	1005019	1665238	975418	1670661	1015897
F	3742299	2124849	3762967	2120216	3593860	2184200
Nuc size (bp)	1178769863	673750720	1186933210	661737880	1157007889	703964616
W	245461482	147737793	244789986	143386446	245587167	149336859
F	933308381	526012927	942143224	518351434	911420722	554627757
Nuc covered %	0.781062	0.89926	0.786471	0.883226	0.800536	0.841733
W	0.162645	0.197187	0.1622	0.191379	0.169922	0.178563
F	0.618418	0.702073	0.624272	0.691847	0.630614	0.66317
* W - well-positioned; F - fuzzy, or weekly-positioned

## Sheet: TableS4-6
Supplementary Table 4. Summary of ATAC-seq and DNase-seq data
Sample	Species/Accession	Raw read pairs	Trimmed&filtered	%Trimmed&filtered	Mapped	%Mapped	Q>20 and Duplication removed	*NSC	*RSC	*Qtag	**Correlation
ATAC-D5-R25	G. raimondii	21079197	21055867	0.998893	20112486	0.955196	9172453	1.43826	1.38845	1	0.97
ATAC-D5-R26	G. raimondii	16236677	16217848	0.99884	15193897	0.936863	7873646	2.48373	1.06772	1	-
DNase-A2-1	G. arboreum	56430184	56423394	0.99988	52045115	0.922403	20344767	1.04076	2.49682	2	0.84
DNase-A2-2	G. arboreum	47790684	47789781	0.999981	44776797	0.936953	21717149	1.06096	1.99164	2	-
DNase-D5-1	G. raimondii	32472389	32467984	0.999864	30402210	0.936375	17003740	1.04506	1.55735	2	1
DNase-D5-2	G. raimondii	40796470	40795622	0.999979	36873380	0.903856	21150696	1.03739	1.03745	1	-
DNase-AD1-l	G. hirsutum	75369752	75360257	0.999874	67896959	0.900965	17964730	1.05216	1.57984	2	0.98
DNase-AD1-2	G. hirsutum	77808868	77807376	0.999981	72132140	0.92706	17924904	1.05276	1.86158	2	-
DNase-AD1-l.fiber	G. hirsutum	76780637	76775066	0.999927	73999758	0.963851	20634241	1.05968	1.67297	2	0.98
DNase-AD1-l.fiber	G. hirsutum	74927191	74916528	0.999858	72307487	0.965174	20299569	1.05986	1.79819	2	-
Gh_DHS_rep1	G. hirsutum	280381456	280319823	0.99978	265946905	0.9487	193318003	40.0322	0.798278	0	1
Gh_DHS_rep2	G. hirsutum	262119262	262060944	0.999778	247705634	0.9452	183550939	1.04147	0.639273	0	-
Gh_DHS_rep3	G. hirsutum	241671285	241620180	0.999789	229303136	0.949	170252471	1.07311	0.922683	0	-
Gr_DHS_rep1	G. raimondii	243660065	243617762	0.999826	233006310	0.949	63002715	1.02259	0.787522	0	1
Gr_DHS_rep2	G. raimondii	250213880	250173560	0.999839	239610452	0.949	139033364	1.02372	0.802407	0	-
Gr_DHS_rep3	G. raimondii	223117741	223082023	0.99984	213866990	0.949	128341451	1.02451	0.758144	0	-
*Strand cross-correlation statistics calculated using phantompeakqualtools. The quality metrics recommended by ENCODE as successful experiment are NSC > 1.05 and RSC > 0.8. Datasets with NSC values much less than 1.1 (< 1.05) tend to have low signal to noise or few peaks. Datasets with RSC values significantly lower than 1 (< 0.8) tend to have low signal to noise. Quality tag is based on threshol…
**Peason correlation between replicates
Supplementary Table 5. Comparison of ACR identification in G. raimondii.
ACR	Parameter	number	bp	bpPerc	Min width	Mean width	Median width	Max width	Data source
DNS	*BC=6	62041	4495125	0.006	17	72.4541	57	1263	this study
	BC=6.5	47049	3407451	0.0045	17	72.4235	58	1263
SPO	BC=4	231420	8621673	0.0115	17	37.2555	36	881
	*BC=5	140268	5067295	0.0068	17	36.1258	38	881
ATAC-seq	^Homer, combine reps	17102	6024696	0.008	179	352.28	277	7913
	Homer, intersect reps	7479	2621116	0.0035	29	350.463	286	4389
	*^Genrich	11687	4582726	0.0061	23	392.122	259	46517
	^MACS2, combine reps	16195	5465396	0.0073	156	337.474	289	2531
	MACS2, intersect reps	6171	1930295	0.0026	2	312.801	271	2387
DNase-seq	MACS2, combine reps	38108	13603756	0.0182	169	356.979	294	2341	Wang et al., Nat Plants 2018
	*MACS2, intersect reps	12960	3364288	0.0045	2	259.59	217	2327
DNase-seq	Genrich	59763	34144955	0.0455735	28	571.339	413	30396	Han et al., PNAS 2022
	MACS2, combine reps	104391	64517468	0.0861119	144	618.037	453	4820
	MACS2, intersect reps	27717	15229207	0.0203265	1	549.454	442	3733
	Genrich intersect with MACS2, combine reps	51950	28034281	0.0374176	1	539.64	430	4820
	*Genrich intersect with MACS2, intersect reps	18088	9021928	0.0120416	1	498.78	403	3733
* Results reported in main text and in Figure 1
^ Results reported in Supplementary text 1
Supplementary Table 6. Overlaps of ACR identification in G. raimondii.
ACR		DNS	DNS	SPO	SPO	ATAC-seq	ATAC-seq	ATAC-seq	ATAC-seq	ATAC-seq	DNase-seq	DNase-seq	DNase-seq	DNase-seq
	Parameter	*BC=6	BC=6.5	BC=4	*BC=5	^Homer, combine reps	Homer, intersect reps	*^Genrich	^MACS2, combine reps	MACS2, intersect reps	MACS2, combine reps	*MACS2, intersect reps	MACS2, intersect reps	*Genrich intersect with MACS2, intersect reps
DNS	*BC=6	NA	0.7309	0.2384	0.1767	0.0184	0.0104	0.0128	0.0171	0.0088	0.0339	0.0123	0.0368	0.0214
DNS	BC=6.5	1	NA	0.2528	0.1879	0.02	0.0119	0.0146	0.0188	0.0102	0.0357	0.0138	0.0364	0.0214
SPO	BC=4	0.066	0.053	-	0.6049	0.0212	0.0104	0.0135	0.0192	0.0083	0.0396	0.0122	0.0463	0.0293
SPO	*BC=5	0.08	0.0648	1	-	0.0246	0.0125	0.0162	0.0222	0.0102	0.0434	0.0145	0.0503	0.0324
ATAC-seq	^Homer, combine reps	0.059	0.0482	0.2392	0.1713	-	0.4293	0.5458	0.72	0.3435	0.4723	0.2315	0.3087	0.2831
ATAC-seq	Homer, intersect reps	0.075	0.0643	0.2671	0.1949	1	-	0.9533	0.9174	0.666	0.5522	0.3069	0.3273	0.3114
ATAC-seq	*^Genrich	0.059	0.0495	0.2157	0.1575	0.7955	0.5982	-	0.7308	0.4685	0.399	0.2119	0.2582	0.2459
ATAC-seq	^MACS2, combine reps	0.058	0.0485	0.2328	0.1657	0.7634	0.4239	0.534	-	0.3762	0.4729	0.2396	0.2984	0.2661
ATAC-seq	MACS2, intersect reps	0.078	0.0676	0.259	0.1902	0.9712	0.8187	0.9094	1	-	0.5733	0.3322	0.3251	0.3079
DNase-seq (Wang et al., Nat Plants 2018)	MACS2, combine reps	0.049	0.0393	0.2023	0.1368	0.2159	0.1102	0.1247	0.2041	0.0934	-	0.3246	0.3069	0.238
DNase-seq (Wang et al., Nat Plants 2018)	*MACS2, intersect reps	0.051	0.0437	0.1768	0.1246	0.3144	0.1813	0.1964	0.3056	0.1599	1	-	0.3644	0.31
DNase-seq (Han et al., PNAS 2022)	MACS2, intersect reps	0.0729	0.0561	0.3013	0.2124	0.1805	0.0844	0.1047	0.1681	0.0701	0.385	0.1569	-	0.6073
DNase-seq (Han et al., PNAS 2022)	Genrich intersect with MACS2, intersect reps	0.0647	0.0508	0.2947	0.2101	0.2581	0.1248	0.1541	0.2331	0.1027	0.4734	0.2085	1	-
* Results reported in main text and in Figure 1
^ Results reported in Supplementary text 1
The percentage in each cell at the intersection of a row and column represents the overlapping rate between the source feature in row and the linked feature in column.
For example, the cell at the intersection of "DNS BC=6.5" row and "SPO BC=5.0" column indicates that 18.79% of DNS ACRs overlapped with SPO ACRs.

## Sheet: TableS7
Supplementary Table 7. Estimation of nucleosome repeat length (bp) by chromsome
Species	G. arboreum accession A2-101	G. raimondii	G. arboreum x G. raimondii		G. hirsutum cultivar Acala Maxxa
(sub)Genome	A2	D5	F1-At	F1-Dt	AD1-At	AD1-Dt
Chr01	197.4	194.2	197.7	196.3	200.8	203.1
Chr02	197	198.1	197.1	196.4	199.7	196.3
Chr03	198.4	194.5	197.7	197.3	201.9	201.1
Chr04	196.4	197.4	197.8	197.3	197.8	198.1
Chr05	198.6	195.8	196.9	194.6	201.9	200.2
Chr06	197.4	193.7	198.2	194.1	200.4	200.9
Chr07	196.6	196.6	197.1	198.5	198.5	199.3
Chr08	197.3	197.6	197	196.1	199.4	197
Chr09	196.3	199.5	197	198.1	199.3	199.3
Chr10	197.7	194.4	199.2	195.1	201.3	199.7
Chr11	197.9	194.4	196.4	197.2	200.4	202.1
Chr12	196.6	196.2	198.2	196.4	200.9	199.4
Chr13	196.7	198.2	197.5	196	198.1	199.2
Mean	197.254	196.2	197.523	196.415	200.031	199.669
Standard Error	0.206502	0.517885	0.202913	0.358388	0.378151	0.525184
AvsD, T test P-value		0.0284964		0.00429479		0.275991

## Sheet: TableS8-11
Supplementary Table 8. ACR identification by differential nuclease sensitivity analysis (BC=6.0) and subnucleosomal occupancy analysis (BC=4.0) in G.arboreum
ChrName	Length	MSF length	MSF proportion	MSF number	SPO length	SPO proportion	SPO number	ACR length	ACR proportion	ACR number
Chr01	118841821	751703	0.00632524	9967	570662	0.00480186	14873	1264794	0.0106427	23332
Chr02	102461108	632904	0.00617702	8359	423082	0.0041292	11280	1014732	0.00990358	18613
Chr03	130879186	884781	0.00676029	11226	618588	0.0047264	15653	1422630	0.0108698	25184
Chr04	111366730	723990	0.00650095	9321	479868	0.0043089	12753	1156038	0.0103805	20841
Chr05	97787725	676330	0.00691631	8827	568825	0.00581694	14522	1185490	0.0121231	21833
Chr06	130984700	874165	0.00667379	11404	583088	0.00434268	15060	1381786	0.0105492	24914
Chr07	102057614	668784	0.006553	8916	498792	0.00571332	13031	1117139	0.0109462	20622
Chr08	132551461	871993	0.00657852	11436	587432	0.00376301	15780	1402927	0.010584	25612
Chr09	87096684	616838	0.00708222	7926	456237	0.0067446	11745	1026801	0.0117892	18433
Chr10	123894336	872390	0.0070414	11049	614311	0.00368247	15335	1399111	0.0112928	24608
Chr11	131341849	877941	0.0066844	11314	702572	0.00534919	17262	1494952	0.0113821	26835
Chr12	117247798	760265	0.00648426	9470	591006	0.00504066	14813	1273178	0.0108589	22737
Chr13	122676814	752821	0.00613662	9492	549497	0.00447922	14623	1247131	0.010166	22748
Total	1509187826	9964905	0.00660283	128707	7243960	0.00479991	186730	16386709	0.010858	296312
Supplementary Table 9. ACR identification by differential nuclease sensitivity analysis (BC=6.0) and subnucleosomal occupancy analysis (BC=5.0) in G.raimondii
ChrName	Length	MSF length	MSF proportion	MSF number	SPO length	SPO proportion	SPO number	ACR length	ACR proportion	ACR number
*Chr01	55868233	309742	0.00554415	4400	376879	0.00674586	10432	660328	0.0118194	14033
Chr02	62769430	360519	0.00574354	4946	391471	0.00623665	10918	722294	0.0115071	14950
Chr03	45765648	248558	0.0054311	3439	280766	0.00613486	7847	510605	0.0111569	10680
Chr04	62178258	349006	0.00561299	4828	405603	0.00652323	11305	727001	0.0116922	15274
Chr05	64140413	377795	0.00589012	5131	415895	0.00648413	11548	761727	0.0118759	15757
Chr06	51074515	329087	0.00644327	4540	367628	0.00719788	10078	668155	0.013082	13741
Chr07	60982465	391566	0.00642096	5356	458223	0.00751401	12715	814271	0.0133525	16996
Chr08	57128820	335372	0.00587045	4686	395274	0.00691899	10950	702853	0.0123029	14760
Chr09	70713020	458056	0.00647768	5955	548418	0.00775554	15026	963886	0.013631	19762
Chr10	62175169	345912	0.00556351	4795	390541	0.0062813	10793	709984	0.0114191	14785
Chr11	62681010	388604	0.00619971	5494	432946	0.00690713	11865	788410	0.0125781	16333
Chr12	35429946	221614	0.00625499	3152	234912	0.00663032	6536	437799	0.0123568	9075
Chr13	58321163	379294	0.00650354	5319	368739	0.00632256	10255	716342	0.0122827	14649
Total	749228090	4495125	0.00599967	62041	5067295	0.00676335	140268	9183655	0.0122575	190795
*Black list region 23162000-23820000
Supplementary Table 10. ACR identification by differential nuclease sensitivity analysis (BC=6.0) and subnucleosomal occupancy analysis (BC=4) in G.hirsutum
ChrName	Length	MSF length	MSF proportion	MSF number	SPO length	SPO proportion	SPO number	ACR length	ACR proportion	ACR number
A01	119761559	693133	0.00578761	7178	650297	0.00542993	14896	1221563	0.0102	19619																							0.568053
A02	108141443	599631	0.00554488	6507	561854	0.00519555	13277	1071920	0.0099122	17762																							0.544801
A03	113693209	729943	0.00642029	7602	672159	0.00591204	15123	1263185	0.0111105	20060																							0.631041
A04	89180822	481084	0.00539448	5211	457027	0.00512472	10822	865308	0.00970285	14414																							0.529127
A05	111098753	919597	0.00827729	9577	820312	0.00738363	18726	1581719	0.0142371	24710																							0.815042
A06	128195338	732169	0.00571135	7979	667041	0.00520332	15603	1289690	0.0100604	21130																							0.560428
A07	98902531	691389	0.00699061	7323	606739	0.00613472	14113	1188889	0.0120208	18912																							0.685468
A08	127495948	717800	0.00562998	7470	654884	0.00513651	15269	1257745	0.00986498	20165																							0.551314
A09	85335976	660990	0.00774574	6796	564342	0.00661318	12894	1112662	0.0130386	17216																							0.76009
A10	118182687	771885	0.00653129	8353	682843	0.00577786	16010	1340109	0.0113393	21726																							0.641158
A11	124181751	917829	0.00739101	9530	803369	0.0064693	18437	1568587	0.0126314	24603																							0.724474
A12	109474314	729941	0.00666769	7954	668668	0.00610799	15462	1277697	0.0116712	20702																							0.65467
A13	111646624	691640	0.0061949	7242	634015	0.00567877	14384	1204128	0.0107852	19259																							0.605797
D01	65205008	408340	0.0062624	4406	485580	0.00744697	11255	816508	0.0125222	13998																							0.820854
D02	72186496	414117	0.00573677	4705	540162	0.00748287	12295	878474	0.0121695	15244																							0.757703
D03	54956272	312726	0.00569045	3507	402818	0.00732979	9378	659326	0.0119973	11552																							0.743713
D04	58229188	331591	0.00569458	3558	434178	0.00745636	9883	699488	0.0120127	12057																							0.746086
D05	66484719	523329	0.00787142	5736	700826	0.0105412	14760	1121620	0.0168703	18120																							1.028
D06	66684206	416133	0.00624035	4533	499598	0.007492	11453	833333	0.0124967	14282																							0.816138
D07	59440927	387268	0.00651517	4209	488078	0.00821114	11122	804472	0.013534	13689																							0.846456
D08	69427147	439480	0.00633009	4769	516834	0.00744426	11940	875541	0.0126109	14922																							0.825151
D09	54445796	380693	0.00699215	4057	457077	0.00839508	10455	770078	0.0141439	12980																							0.920545
D10	68089194	444522	0.00652852	4801	525619	0.00771957	12160	893148	0.0131173	15150																							0.866461
D11	72823778	527336	0.00724126	5604	667647	0.00916798	14903	1099330	0.0150958	18286																							0.953027
D12	63255146	432078	0.00683072	4555	520497	0.00822853	11855	871639	0.0137797	14624																							0.900384
D13	65099798	387467	0.00595189	4244	498441	0.00765657	11433	819994	0.012596	14164																							0.797622
Total	2281618630	14742111	0.00646125	157406	15180905	0.00665357	347908	27386153	0.0120029	449346
Table S11. ACR identification by differential nuclease sensitivity analysis (BC=6.0) and subnucleosomal occupancy analysis (BC=4.5) in G. arboreum X G. raimondii
ChrName	Length	MSF length	MSF proportion	MSF number	SPO length	SPO proportion	SPO number	ACR length	ACR proportion	ACR number
A01	118841821	781763	0.00657818	10267	808567	0.00680372	20002	1540355	0.0129614	28817
A02	102461108	660771	0.00644899	8743	610695	0.00596026	15196	1234904	0.0120524	22812
A03	130879186	901177	0.00688556	10998	854213	0.00652673	20934	1691790	0.0129263	30362
A04	111366730	723076	0.00649275	9016	688267	0.00618019	17129	1368995	0.0122927	24880
A05	97787725	620548	0.00634587	7973	724315	0.00740701	17852	1301209	0.0133065	24570
A06	130984700	836018	0.00638256	10921	820816	0.0062665	20395	1604633	0.0122505	29837
A07	102057614	646700	0.00633662	8083	697540	0.00683477	17253	1303350	0.0127707	24108
A08	132551461	842122	0.00635317	10579	837298	0.00631678	20897	1628704	0.0122873	29959
A09	87096684	583909	0.00670415	7490	629707	0.00722998	15545	1175491	0.0134964	21921
A10	123894336	870373	0.00702512	11323	840335	0.00678267	20878	1656223	0.013368	30574
A11	131341849	902975	0.006875	11842	903266	0.00687721	22348	1747449	0.0133046	32478
A12	117247798	791054	0.00674686	10309	775858	0.00661725	19169	1518986	0.0129553	28099
A13	122676814	854990	0.00696945	10873	782164	0.00637581	19409	1587466	0.0129402	28754
D01	55868233	316703	0.00566875	4324	768882	0.0137624	14169	1061751	0.0190046	17749
D02	62769430	385823	0.00614667	5297	561406	0.00894394	13893	919355	0.0146465	18335
D03	45765648	264962	0.00578954	3601	418405	0.00914234	10278	662390	0.0144735	13261
D04	62178258	386639	0.00621823	5235	591250	0.00950895	14528	946475	0.015222	18813
D05	64140413	409849	0.00638987	5423	593173	0.00924804	14553	973083	0.0151711	19077
D06	51074515	318369	0.00623342	4348	488747	0.00956929	11983	782140	0.0153137	15568
D07	60982465	377605	0.00619203	4967	609534	0.00999523	14891	953141	0.0156298	18871
D08	57128820	316780	0.00554501	4348	529395	0.00926669	13019	821356	0.0143773	16610
D09	70713020	431727	0.00610534	5718	703367	0.00994678	17123	1099521	0.0155491	21792
D10	62175169	387177	0.0062272	4929	581922	0.0093594	14357	940259	0.0151227	18431
D11	62681010	392378	0.00625992	5012	593824	0.00947375	14478	954938	0.0152349	18571
D12	35429946	207981	0.0058702	2767	336398	0.00949474	8291	527642	0.0148925	10572
D13	58321163	351022	0.00601878	4452	535389	0.00918001	13193	856445	0.014685	16833
Total	2258415916	14562491	0.0064481	188838	17284733	0.00765348	421763	30858051	0.0136636	581654

## Sheet: TableS12
Supplementary Table 12. Ranking of significantly enriched motifs in 1 kb promoter ACRs
Ath_motifs	F1d	F1a	D5	AD1d	AD1a	A2	pattern	family
AT1G01060	77	74	76	85	71	110	111111	MYB_related
AT1G01250	NA	NA	292	NA	376	NA	010010	ERF
AT1G01260	241	NA	204	196	189	257	110111	bHLH
AT1G01720	306	NA	NA	245	NA	288	100101	NAC
AT1G02065	46	50	49	68	65	50	111111	SBP
AT1G02230	NA	NA	NA	NA	372	279	100010	NAC
AT1G06160	213	247	198	247	260	233	111111	ERF
AT1G06180	NA	NA	NA	349	366	NA	000011	MYB
AT1G06280	285	243	301	NA	NA	277	111100	LBD
AT1G06850	312	NA	NA	344	307	301	100111	bZIP
AT1G08000	61	71	68	79	94	70	111111	GATA
AT1G08010	297	NA	273	340	NA	NA	010101	GATA
AT1G08810	NA	NA	NA	380	NA	325	100001	MYB
AT1G09030	1	1	1	1	1	1	111111	NF-YB
AT1G09530	174	182	172	126	130	147	111111	bHLH
AT1G09540	NA	NA	NA	296	314	NA	000011	MYB
AT1G12260	303	240	NA	291	342	268	101111	NAC
AT1G13260	231	224	208	341	356	214	111111	RAV
AT1G13300	229	NA	257	330	329	231	110111	G2-like
AT1G14687	81	65	95	89	106	91	111111	ZF-HD
AT1G15720	107	140	119	134	123	122	111111	MYB_related
AT1G16490	NA	NA	NA	369	358	NA	000011	MYB
AT1G17950	105	81	126	121	124	113	111111	MYB
AT1G18330	142	127	149	150	129	146	111111	MYB_related
AT1G18570	NA	NA	NA	303	267	NA	000011	MYB
AT1G18960	291	NA	NA	NA	370	NA	000110	MYB_related
AT1G19000	NA	254	291	307	255	300	111011	MYB_related
AT1G19210	281	NA	NA	NA	NA	310	100100	ERF
AT1G19350	214	270	203	160	170	213	111111	BES1
AT1G19850	110	93	98	119	133	92	111111	ARF
AT1G20980	170	163	192	157	184	185	111111	SBP
AT1G22640	266	NA	251	250	254	236	110111	MYB
AT1G24260	220	128	157	199	186	154	111111	MIKC_MADS
AT1G25340	215	183	181	244	249	208	111111	MYB
AT1G25550	139	133	116	135	174	101	111111	G2-like
AT1G25560	40	51	44	62	56	35	111111	RAV
AT1G27360	36	35	47	45	41	55	111111	SBP
AT1G27730	76	90	63	63	85	61	111111	C2H2
AT1G28300	180	168	220	215	221	171	111111	B3
AT1G28360	218	273	270	289	241	295	111111	ERF
AT1G28470	NA	NA	NA	304	NA	305	100001	NAC
AT1G29160	141	121	155	139	115	162	111111	Dof
AT1G29280	263	233	240	232	229	243	111111	WRKY
AT1G29860	264	237	213	186	195	193	111111	WRKY
AT1G30210	NA	NA	NA	352	355	NA	000011	TCP
AT1G30490	289	192	262	327	337	297	111111	HD-ZIP
AT1G30650	NA	NA	NA	342	353	NA	000011	WRKY
AT1G32150	NA	NA	NA	324	350	NA	000011	bZIP
AT1G32240	247	186	188	225	234	194	111111	G2-like
AT1G32640	188	220	169	125	132	209	111111	bHLH
AT1G33240	50	31	51	60	60	46	111111	Trihelix
AT1G34180	NA	NA	NA	318	NA	NA	000001	NAC
AT1G34370	NA	NA	NA	364	336	234	100011	C2H2
AT1G34670	NA	NA	NA	317	364	NA	000011	MYB
AT1G35460	268	209	212	251	244	186	111111	bHLH
AT1G35560	NA	NA	NA	386	NA	NA	000001	TCP
AT1G36060	NA	NA	NA	NA	NA	319	100000	ERF
AT1G42990	NA	NA	NA	323	NA	NA	000001	bZIP
AT1G45249	NA	NA	NA	301	289	NA	000011	bZIP
AT1G47655	12	13	13	15	15	12	111111	Dof
AT1G49010	168	266	146	181	160	200	111111	MYB
AT1G49480	98	86	118	95	100	94	111111	B3
AT1G49560	134	136	151	178	176	145	111111	G2-like
AT1G49950	57	53	54	47	61	57	111111	MYB_related
AT1G51140	216	210	180	192	217	142	111111	bHLH
AT1G51220	198	NA	185	384	296	248	110111	C2H2
AT1G51700	67	72	90	76	64	85	111111	Dof
AT1G52150	313	211	NA	335	375	264	101111	HD-ZIP
AT1G52880	NA	NA	NA	355	322	NA	000011	NAC
AT1G52890	228	268	NA	292	335	NA	001111	NAC
AT1G53160	158	162	163	131	181	163	111111	SBP
AT1G53230	NA	NA	NA	257	321	NA	000011	TCP
AT1G59640	295	NA	NA	238	227	NA	000111	bHLH
AT1G59750	120	122	110	92	93	104	111111	ARF
AT1G60920	21	15	19	20	17	16	111111	M-type_MADS
AT1G61110	69	73	73	52	54	79	111111	NAC
AT1G62300	NA	NA	NA	333	304	NA	000011	WRKY
AT1G63030	282	263	NA	265	323	244	101111	ERF
AT1G64620	42	54	55	43	33	80	111111	Dof
AT1G65910	NA	NA	NA	NA	NA	267	100000	NAC
AT1G66370	83	104	93	102	102	81	111111	MYB
AT1G66600	60	67	69	59	68	62	111111	WRKY
AT1G67710	192	172	217	183	262	212	111111	ARR-B
AT1G68320	164	142	142	164	171	149	111111	MYB
AT1G68670	251	271	219	309	300	287	111111	G2-like
AT1G68840	55	58	58	73	77	47	111111	RAV
AT1G69120	199	187	167	221	233	216	111111	MIKC_MADS
AT1G69180	8	8	9	16	14	11	111111	YABBY
AT1G69310	27	26	25	17	20	24	111111	WRKY
AT1G69490	163	167	140	132	152	173	111111	NAC
AT1G69560	235	158	197	235	246	172	111111	MYB
AT1G69570	NA	269	NA	299	242	NA	001011	Dof
AT1G69780	24	23	26	29	25	26	111111	HD-ZIP
AT1G70000	45	40	39	37	43	38	111111	MYB_related
AT1G70920	126	100	97	116	107	84	111111	HD-ZIP
AT1G71930	305	260	253	234	240	NA	011111	NAC
AT1G72010	NA	NA	NA	383	345	NA	000011	TCP
AT1G73360	179	204	175	263	293	225	111111	HD-ZIP
AT1G74650	309	NA	NA	334	NA	NA	000101	MYB
AT1G74840	88	101	89	99	112	112	111111	MYB_related
AT1G74930	NA	267	NA	298	343	283	101011	ERF
AT1G75240	41	44	45	50	53	36	111111	ZF-HD
AT1G76870	103	134	102	147	109	135	111111	Trihelix
AT1G76880	144	79	135	136	135	152	111111	Trihelix
AT1G76890	101	83	152	145	105	109	111111	Trihelix
AT1G77080	NA	NA	NA	NA	379	NA	000010	MIKC_MADS
AT1G78080	66	99	79	87	97	72	111111	ERF
AT1G80840	194	215	182	146	140	176	111111	WRKY
AT2G01060	277	NA	294	308	NA	NA	010101	G2-like
AT2G01570	NA	244	NA	216	280	260	101011	GRAS
AT2G01760	138	154	147	148	143	144	111111	ARR-B
AT2G01940	244	185	207	284	207	255	111111	C2H2
AT2G02450	NA	NA	NA	345	NA	NA	000001	NAC
AT2G02540	NA	264	NA	326	NA	299	101001	ZF-HD
AT2G03340	196	177	170	149	148	158	111111	WRKY
AT2G03500	181	206	168	231	222	203	111111	G2-like
AT2G03710	230	238	177	297	270	NA	011111	MIKC_MADS
AT2G06200	167	214	225	220	197	166	111111	GRF
AT2G15740	152	157	145	114	122	134	111111	C2H2
AT2G17180	217	205	193	209	202	177	111111	C2H2
AT2G17950	212	213	234	204	206	247	111111	WOX
AT2G18060	137	147	131	120	142	118	111111	NAC
AT2G18300	NA	NA	279	337	261	262	110011	bHLH
AT2G18350	31	32	34	54	47	52	111111	ZF-HD
AT2G18380	182	193	258	242	235	189	111111	GATA
AT2G20110	90	111	101	113	134	182	111111	CPP
AT2G20180	NA	NA	255	224	198	265	110011	bHLH
AT2G20400	NA	NA	NA	354	348	NA	000011	G2-like
AT2G20570	140	102	113	112	149	86	111111	G2-like
AT2G21230	243	NA	221	171	225	289	110111	bZIP
AT2G21900	84	76	74	56	62	83	111111	WRKY
AT2G22300	85	105	77	40	58	78	111111	CAMTA
AT2G22430	19	22	23	23	24	23	111111	HD-ZIP
AT2G23290	NA	262	NA	NA	332	322	101010	MYB
AT2G23320	187	191	191	180	163	174	111111	WRKY
AT2G24260	128	166	111	90	91	132	111111	bHLH
AT2G24570	NA	NA	NA	315	278	NA	000011	WRKY
AT2G25000	176	235	196	219	187	204	111111	WRKY
AT2G26960	73	57	64	107	80	60	111111	MYB
AT2G28550	NA	NA	NA	382	374	NA	000011	AP2
AT2G28810	93	77	104	101	88	120	111111	Dof
AT2G30250	161	151	141	152	147	141	111111	WRKY
AT2G30590	290	NA	231	248	258	227	110111	WRKY
AT2G32460	211	216	211	200	180	206	111111	MYB
AT2G33550	114	160	154	156	178	170	111111	Trihelix
AT2G33810	157	138	159	124	156	155	111111	SBP
AT2G33860	131	131	112	165	172	130	111111	ARF
AT2G35530	NA	NA	NA	319	318	NA	000011	bZIP
AT2G36010	NA	NA	293	NA	NA	NA	010000	E2F/DP
AT2G36270	NA	NA	NA	NA	339	NA	000010	bZIP
AT2G36610	5	2	7	11	13	7	111111	HD-ZIP
AT2G37590	43	42	48	42	28	44	111111	Dof
AT2G38090	NA	NA	NA	375	377	NA	000011	MYB
AT2G38300	33	28	30	35	37	33	111111	G2-like
AT2G38470	195	165	173	155	153	159	111111	WRKY
AT2G38880	68	91	72	93	101	77	111111	NF-YB
AT2G40220	237	NA	222	272	331	NA	010111	ERF
AT2G40260	30	30	36	41	48	43	111111	G2-like
AT2G40620	NA	NA	NA	332	316	NA	000011	bZIP
AT2G40740	302	NA	289	273	277	286	110111	WRKY
AT2G41690	NA	NA	NA	385	NA	NA	000001	HSF
AT2G41835	6	6	6	5	4	6	111111	C2H2
AT2G42200	49	49	50	36	50	42	111111	SBP
AT2G42280	226	197	161	203	182	143	111111	bHLH
AT2G43010	125	126	105	64	69	102	111111	bHLH
AT2G44745	233	NA	307	254	220	296	110111	WRKY
AT2G45190	37	27	43	39	42	49	111111	YABBY
AT2G45660	234	242	NA	189	150	217	101111	MIKC_MADS
AT2G46130	NA	NA	300	311	282	326	110011	WRKY
AT2G46400	248	230	233	262	275	246	111111	WRKY
AT2G46510	NA	NA	266	306	271	309	110011	bHLH
AT2G46590	17	21	18	14	9	22	111111	Dof
AT2G46680	283	229	241	285	298	263	111111	HD-ZIP
AT2G46830	62	60	70	48	39	71	111111	MYB_related
AT2G47260	95	88	86	77	82	90	111111	WRKY
AT2G47460	258	NA	275	258	295	258	110111	MYB
AT3G01220	80	63	78	80	89	66	111111	HD-ZIP
AT3G01470	59	55	60	66	70	48	111111	HD-ZIP
AT3G01530	NA	NA	NA	378	NA	NA	000001	MYB
AT3G01970	279	274	239	214	212	228	111111	WRKY
AT3G02150	NA	NA	NA	372	371	NA	000011	TCP
AT3G02940	NA	NA	NA	275	288	276	100011	MYB
AT3G03200	NA	NA	NA	376	NA	NA	000001	NAC
AT3G03660	52	59	52	75	59	63	111111	WOX
AT3G04030	135	120	125	128	169	100	111111	G2-like
AT3G04070	190	201	166	168	162	275	111111	NAC
AT3G06490	143	135	120	161	139	93	111111	MYB
AT3G08500	210	223	229	222	238	221	111111	MYB
AT3G09230	299	184	252	269	315	242	111111	MYB
AT3G09600	89	80	92	84	84	114	111111	MYB_related
AT3G10030	NA	NA	NA	NA	362	NA	000010	Trihelix
AT3G10113	74	75	83	72	75	96	111111	MYB_related
AT3G10480	NA	NA	NA	NA	NA	313	100000	NAC
AT3G10580	227	NA	242	239	219	202	110111	MYB_related
AT3G10800	NA	NA	NA	252	274	NA	000011	bZIP
AT3G11280	156	132	138	163	154	123	111111	MYB
AT3G11440	153	159	190	143	164	126	111111	MYB
AT3G12130	13	20	17	12	10	21	111111	C3H
AT3G12720	NA	NA	NA	370	325	NA	000011	MYB
AT3G12820	NA	NA	NA	366	308	NA	000011	MYB
AT3G13040	9	12	8	7	11	9	111111	G2-like
AT3G13810	308	217	277	212	203	316	111111	C2H2
AT3G14180	310	NA	NA	NA	NA	NA	000100	Trihelix
AT3G15030	280	239	254	122	144	223	111111	TCP
AT3G15170	NA	NA	NA	NA	344	NA	000010	NAC
AT3G15270	284	NA	NA	350	327	NA	000111	SBP
AT3G15500	307	NA	281	274	305	NA	010111	NAC
AT3G16280	NA	NA	NA	388	365	318	100011	ERF
AT3G16770	200	196	227	229	297	235	111111	ERF
AT3G20770	NA	NA	NA	NA	NA	312	100000	EIL
AT3G22170	NA	NA	260	202	218	NA	010011	FAR1
AT3G22760	2	3	2	3	3	4	111111	CPP
AT3G22780	102	116	117	106	146	219	111111	CPP
AT3G23210	NA	NA	NA	365	333	NA	000011	bHLH
AT3G23690	NA	NA	295	343	259	NA	010011	bHLH
AT3G24120	18	19	14	21	22	8	111111	G2-like
AT3G24520	NA	NA	NA	362	346	298	100011	HSF
AT3G24650	124	178	144	184	201	160	111111	B3
AT3G25730	56	70	62	88	90	54	111111	RAV
AT3G26620	296	NA	NA	379	NA	NA	000101	LBD
AT3G28920	54	46	56	94	66	73	111111	ZF-HD
AT3G30210	116	109	121	109	116	125	111111	MYB
AT3G45150	NA	NA	NA	286	324	NA	000011	TCP
AT3G45170	145	173	158	191	200	168	111111	GATA
AT3G45610	82	114	109	74	78	119	111111	Dof
AT3G46070	236	NA	249	193	205	188	110111	C2H2
AT3G46090	28	47	29	26	30	27	111111	C2H2
AT3G46640	92	148	96	100	137	99	111111	G2-like
AT3G47500	146	169	160	151	136	199	111111	Dof
AT3G48430	256	225	290	266	351	NA	011111	C2H2
AT3G49530	250	NA	232	313	303	274	110111	NAC
AT3G49930	14	11	11	8	12	10	111111	C2H2
AT3G50060	183	137	216	205	165	115	111111	MYB
AT3G50410	72	69	75	70	55	76	111111	Dof
AT3G51080	221	NA	299	302	NA	327	110101	GATA
AT3G52440	15	18	15	9	7	14	111111	Dof
AT3G53200	NA	NA	285	NA	373	NA	010010	MYB
AT3G54340	301	261	248	359	281	271	111111	MIKC_MADS
AT3G54990	165	203	199	213	215	224	111111	AP2
AT3G55370	106	95	137	129	103	169	111111	Dof
AT3G56400	NA	NA	NA	381	NA	NA	000001	WRKY
AT3G56850	NA	NA	NA	387	340	NA	000011	bZIP
AT3G57920	NA	NA	NA	NA	369	NA	000010	SBP
AT3G58780	269	NA	276	281	245	282	110111	MIKC_MADS
AT3G59060	118	106	108	71	81	103	111111	bHLH
AT3G60030	47	56	46	33	46	56	111111	SBP
AT3G60530	169	NA	228	312	265	NA	010111	GATA
AT3G60580	4	4	3	4	6	3	111111	C2H2
AT3G61150	133	150	139	176	213	148	111111	HD-ZIP
AT3G61250	NA	NA	305	321	319	NA	010011	MYB
AT3G61890	53	38	42	55	44	34	111111	HD-ZIP
AT3G61910	224	246	184	187	209	232	111111	NAC
AT4G00050	87	108	81	57	57	98	111111	bHLH
AT4G00250	267	NA	265	278	257	303	110111	GeBP
AT4G00270	219	265	NA	338	283	290	101111	GeBP
AT4G00730	171	188	171	227	230	197	111111	HD-ZIP
AT4G01250	NA	NA	246	271	290	293	110011	WRKY
AT4G01280	97	97	100	103	87	128	111111	MYB_related
AT4G01500	293	241	236	351	268	211	111111	B3
AT4G01540	270	NA	NA	357	302	220	100111	NAC
AT4G01550	257	NA	NA	322	285	261	100111	NAC
AT4G01680	NA	NA	NA	NA	NA	323	100000	MYB
AT4G01720	252	NA	278	259	306	215	110111	WRKY
AT4G04450	NA	NA	NA	353	334	304	100011	WRKY
AT4G05100	292	NA	280	261	223	266	110111	MYB
AT4G14410	NA	NA	NA	NA	347	NA	000010	bHLH
AT4G14770	91	112	99	115	125	187	111111	CPP
AT4G15090	NA	NA	NA	361	NA	NA	000001	FAR1
AT4G16110	70	66	59	69	92	59	111111	ARR-B
AT4G16150	NA	NA	NA	310	NA	NA	000001	CAMTA
AT4G16430	225	NA	205	169	166	237	110111	bHLH
AT4G17460	58	61	57	82	73	58	111111	HD-ZIP
AT4G17785	249	232	243	246	194	207	111111	MYB
AT4G17880	155	180	128	123	127	165	111111	bHLH
AT4G17980	262	NA	NA	314	NA	241	100101	NAC
AT4G18170	186	212	176	153	126	180	111111	WRKY
AT4G18390	238	176	296	144	117	153	111111	TCP
AT4G18770	207	228	286	279	292	238	111111	MYB
AT4G18890	NA	NA	247	256	301	NA	010011	BES1
AT4G18960	240	NA	223	347	326	NA	010111	MIKC_MADS
AT4G21030	109	139	150	130	113	167	111111	Dof
AT4G21040	232	249	306	300	272	249	111111	Dof
AT4G21080	162	175	202	188	158	181	111111	Dof
AT4G22070	NA	NA	NA	328	256	NA	000011	WRKY
AT4G23550	193	195	206	174	168	190	111111	WRKY
AT4G23750	265	227	245	293	312	284	111111	ERF
AT4G24020	154	123	115	138	119	116	111111	Nin-like
AT4G24470	NA	NA	NA	346	NA	NA	000001	GATA
AT4G25470	NA	NA	NA	NA	NA	311	100000	ERF
AT4G25480	260	NA	264	276	273	229	110111	ERF
AT4G25490	253	248	226	241	279	201	111111	ERF
AT4G26640	177	198	183	167	179	156	111111	WRKY
AT4G28500	278	NA	NA	253	357	269	100111	NAC
AT4G29000	11	10	12	10	16	13	111111	CPP
AT4G29230	NA	NA	NA	305	NA	294	100001	NAC
AT4G31550	NA	NA	NA	325	320	NA	000011	WRKY
AT4G31610	132	117	123	170	151	105	111111	B3
AT4G31800	100	103	94	96	114	89	111111	WRKY
AT4G31920	26	29	24	27	29	25	111111	ARR-B
AT4G32730	NA	219	NA	358	247	285	101011	MYB
AT4G32890	149	200	148	182	185	139	111111	GATA
AT4G34000	288	NA	230	140	128	NA	010111	bZIP
AT4G35550	29	36	27	38	35	32	111111	WOX
AT4G35580	184	149	179	197	196	175	111111	NAC
AT4G36160	245	234	NA	320	368	292	101111	NAC
AT4G36620	261	255	297	356	264	250	111111	GATA
AT4G36730	119	174	130	86	76	117	111111	bZIP
AT4G36740	NA	NA	NA	363	NA	NA	000001	HD-ZIP
AT4G36900	NA	256	NA	NA	NA	NA	001000	ERF
AT4G36930	123	155	136	81	86	121	111111	bHLH
AT4G37180	108	85	106	104	121	74	111111	G2-like
AT4G37260	113	48	124	110	67	67	111111	MYB
AT4G37790	51	41	38	61	49	53	111111	HD-ZIP
AT4G38000	272	226	NA	294	239	NA	001111	Dof
AT4G38620	75	92	71	65	74	69	111111	MYB
AT4G40060	10	9	10	22	19	17	111111	HD-ZIP
AT5G01380	NA	253	256	194	216	308	111011	Trihelix
AT5G01900	96	82	87	97	96	82	111111	WRKY
AT5G02320	NA	272	NA	377	291	314	101011	MYB
AT5G02460	127	96	122	142	98	129	111111	Dof
AT5G02840	130	124	132	127	110	150	111111	MYB_related
AT5G03790	271	221	282	260	328	222	111111	HD-ZIP
AT5G04340	78	68	65	141	111	87	111111	C2H2
AT5G04390	25	24	21	19	26	15	111111	C2H2
AT5G04410	122	145	88	91	95	68	111111	NAC
AT5G04760	104	125	133	111	118	107	111111	MYB
AT5G05090	65	98	67	67	72	64	111111	G2-like
AT5G05550	300	NA	NA	NA	NA	NA	000100	Trihelix
AT5G05790	246	207	250	228	199	218	111111	MYB
AT5G06100	136	89	162	198	155	97	111111	MYB
AT5G07100	NA	NA	NA	267	294	321	100011	WRKY
AT5G08070	NA	NA	NA	374	352	NA	000011	TCP
AT5G08130	NA	NA	288	295	237	280	110011	bHLH
AT5G08330	NA	NA	NA	NA	363	NA	000010	TCP
AT5G08520	223	236	218	208	183	178	111111	MYB
AT5G09410	311	NA	238	223	243	NA	010111	CAMTA
AT5G10030	286	NA	NA	288	311	328	100111	bZIP
AT5G10140	NA	258	274	NA	NA	NA	011000	MIKC_MADS
AT5G10280	115	113	84	83	108	88	111111	MYB
AT5G11260	NA	NA	NA	NA	361	NA	000010	bZIP
AT5G11510	NA	251	NA	277	228	259	101011	MYB
AT5G12870	150	153	129	133	141	164	111111	MYB
AT5G13080	NA	NA	NA	264	253	315	100011	WRKY
AT5G14340	159	144	200	172	138	151	111111	MYB
AT5G15800	254	NA	201	290	299	254	110111	MIKC_MADS
AT5G16600	242	190	235	217	208	196	111111	MYB
AT5G16820	NA	NA	NA	339	330	306	100011	HSF
AT5G17300	79	84	82	78	83	108	111111	MYB_related
AT5G17430	175	170	214	185	167	161	111111	AP2
AT5G17800	148	110	164	154	157	131	111111	MYB
AT5G18090	117	107	91	117	159	75	111111	B3
AT5G18830	287	NA	302	240	341	NA	010111	SBP
AT5G20240	205	222	209	206	252	253	111111	MIKC_MADS
AT5G22220	147	161	153	137	131	137	111111	E2F/DP
AT5G22570	206	250	267	226	204	230	111111	WRKY
AT5G22990	294	NA	263	287	236	317	110111	C2H2
AT5G23280	NA	NA	NA	NA	359	NA	000010	TCP
AT5G24110	274	NA	NA	280	313	302	100111	WRKY
AT5G25475	23	17	22	25	23	19	111111	B3
AT5G25810	NA	NA	261	NA	NA	320	110000	ERF
AT5G25830	275	NA	244	316	310	NA	010111	GATA
AT5G26170	201	194	174	159	145	191	111111	WRKY
AT5G28300	112	130	156	177	173	157	111111	Trihelix
AT5G28770	NA	NA	NA	NA	224	251	100010	bZIP
AT5G29000	304	NA	303	329	NA	329	110101	G2-like
AT5G37020	64	64	66	58	51	39	111111	ARF
AT5G39610	NA	NA	NA	371	NA	NA	000001	NAC
AT5G39660	3	5	4	2	2	2	111111	Dof
AT5G39760	178	129	165	255	276	270	111111	ZF-HD
AT5G40330	34	45	37	32	40	30	111111	MYB
AT5G41570	NA	NA	NA	268	338	NA	000011	WRKY
AT5G42630	166	119	143	175	175	124	111111	G2-like
AT5G43410	202	245	195	236	269	245	111111	ERF
AT5G45300	NA	NA	NA	348	NA	NA	000001	BES1
AT5G45580	191	199	178	233	266	183	111111	G2-like
AT5G46350	NA	NA	NA	336	NA	NA	000001	WRKY
AT5G46590	NA	NA	NA	NA	NA	291	100000	NAC
AT5G46760	86	115	80	49	63	95	111111	bHLH
AT5G46830	204	NA	268	243	263	256	110111	bHLH
AT5G47370	35	33	31	44	32	37	111111	HD-ZIP
AT5G47390	203	231	215	207	214	179	111111	MYB_related
AT5G47660	209	164	237	230	232	273	111111	Trihelix
AT5G48560	NA	NA	NA	218	251	NA	000011	bHLH
AT5G48670	20	16	20	18	18	20	111111	M-type_MADS
AT5G49330	185	202	189	179	211	198	111111	MYB
AT5G50570	173	171	186	162	190	192	111111	SBP
AT5G51910	273	208	NA	201	188	240	101111	TCP
AT5G51990	255	NA	298	282	284	239	110111	ERF
AT5G52020	276	NA	259	367	NA	NA	010101	ERF
AT5G52170	129	143	107	166	193	136	111111	HD-ZIP
AT5G52660	121	118	127	118	99	138	111111	MYB_related
AT5G52830	NA	NA	NA	360	360	NA	000011	WRKY
AT5G53950	NA	NA	NA	NA	367	NA	000010	NAC
AT5G54230	259	218	269	270	231	226	111111	MYB
AT5G56110	151	156	134	158	161	140	111111	MYB
AT5G56270	44	52	41	34	36	41	111111	WRKY
AT5G56840	NA	NA	NA	373	317	NA	000011	MYB_related
AT5G58080	99	146	114	108	120	106	111111	ARR-B
AT5G58620	7	7	5	6	5	5	111111	C3H
AT5G58850	239	181	304	283	286	195	111111	MYB
AT5G58900	160	257	194	190	177	184	111111	MYB_related
AT5G59780	111	78	85	98	104	111	111111	MYB_related
AT5G60120	189	141	187	210	248	210	111111	AP2
AT5G60130	NA	NA	NA	NA	349	NA	000010	B3
AT5G60850	22	25	28	24	21	29	111111	Dof
AT5G60970	NA	NA	NA	195	226	281	100011	TCP
AT5G61270	NA	NA	NA	NA	380	NA	000010	bHLH
AT5G61620	208	179	210	211	210	205	111111	MYB_related
AT5G62000	38	43	35	31	31	28	111111	ARF
AT5G62020	NA	NA	287	368	378	307	110011	HSF
AT5G62165	39	37	32	30	34	31	111111	MIKC_MADS
AT5G62320	298	NA	271	249	250	272	110111	MYB
AT5G62940	94	94	103	105	79	127	111111	Dof
AT5G63260	16	14	16	13	8	18	111111	C3H
AT5G64220	71	87	61	28	27	65	111111	CAMTA
AT5G65310	48	39	40	46	45	40	111111	HD-ZIP
AT5G65410	32	34	33	51	38	51	111111	ZF-HD
AT5G65510	197	252	283	NA	287	278	111110	AP2
AT5G66700	172	152	224	173	192	133	111111	HD-ZIP
AT5G66730	NA	NA	NA	NA	354	NA	000010	C2H2
AT5G66940	222	189	284	237	191	324	111111	Dof
AT5G67450	63	62	53	53	52	45	111111	C2H2
AT5G67580	NA	259	272	331	309	252	111011	MYB_related

## Sheet: TableS13-14
Supplementary Table 13. Genome-wide TE classification and composition
Calssfication	A2: Length(bp)	A2: Length(%)	D5: Length(bp)	D5: Length(%)	AD1: Length(bp)	AD1: Length(%)	AD1-At: Length(bp)	AD1-At: Length(%)	AD1-Dt: Length(bp)	AD1-Dt: Length(%)
LTR/Copia	62748671	4.15778	49826604	6.65039	141975439	6.22258	72481430	5.01501	69494009	8.30942
LTR/Gypsy	1012916786	67.1167	191656518	25.5805	1117536095	48.98	843901542	58.3897	273634553	32.7186
LTR/unknown	346193531	22.9391	101357887	13.5283	478248425	20.9609	336177400	23.2602	142071025	16.9875
nonTIR/Helitron	1910403	0.126585	2360023	0.314994	4163262	0.18247	1887803	0.130618	2275459	0.272077
TIR/CACTA	28760462	1.90569	29411513	3.92558	58822874	2.57812	28513133	1.97283	30309741	3.62415
TIR/hAT	13852618	0.917886	14024987	1.87192	28017488	1.22797	13788483	0.954028	14229005	1.70137
TIR/Mutator	70804083	4.69154	84999004	11.3449	164964454	7.23015	73953070	5.11683	91011384	10.8823
TIR/PIF_Harbinger	8914118	0.590657	10542322	1.40709	19999022	0.876528	9310885	0.644222	10688137	1.27798
TIR/Tc1_Mariner	4656515	0.308544	5542924	0.739818	10365336	0.454297	4819311	0.333449	5546025	0.66314
TE	1242972376	82.3604	445743436	59.4937	1713349339	75.0936	1173413681	81.1888	539935658	64.5603
gene	114602494	7.59365	120990825	16.1487	247209493	10.8348	121478331	8.40511	124794516	14.9217
Supplementary Table 14. TE-derived ACR distribution and composition
Classification	A2: Length(bp)	D5: Length(bp)	F1-At: Length(bp)	F1-Dt: Length(bp)	AD1-At: Length(%)	AD1-Dt: Length(bp)	Feature
ambiguous	9454	8340	15037	13698	11092	10217	Promoter (2-3kb)
LTR/Copia	16569	15008	24292	20776	21407	18052	Promoter (2-3kb)
LTR/Gypsy	37190	20288	47358	32430	43375	24561	Promoter (2-3kb)
LTR/unknown	21247	18794	31785	25800	22726	20927	Promoter (2-3kb)
nonTE	928126	790185	977971	845394	1205287	976469	Promoter (2-3kb)
nonTIR/Helitron	927	825	1560	1173	1215	807	Promoter (2-3kb)
TIR/CACTA	10531	6787	13368	10611	10511	10226	Promoter (2-3kb)
TIR/hAT	11562	13094	22941	18263	18953	17116	Promoter (2-3kb)
TIR/Mutator	37229	38752	63659	55713	59103	46575	Promoter (2-3kb)
TIR/PIF_Harbinger	2247	2417	4335	4157	2651	1737	Promoter (2-3kb)
TIR/Tc1_Mariner	1195	1250	1870	2641	1548	1659	Promoter (2-3kb)
ambiguous	10331	9300	15935	11913	10827	9362	Promoter (1-2kb)
LTR/Copia	20831	13632	23420	19076	19925	18945	Promoter (1-2kb)
LTR/Gypsy	27682	15337	36964	22123	29504	18273	Promoter (1-2kb)
LTR/unknown	20109	13804	27354	19394	19953	20870	Promoter (1-2kb)
nonTE	1212009	1002303	1212751	1042219	1547878	1276426	Promoter (1-2kb)
nonTIR/Helitron	1461	1764	2273	1587	1918	2201	Promoter (1-2kb)
TIR/CACTA	10970	10868	12847	12852	12207	14191	Promoter (1-2kb)
TIR/hAT	17423	14014	29142	23098	24680	20087	Promoter (1-2kb)
TIR/Mutator	50710	43973	72381	61988	72119	65887	Promoter (1-2kb)
TIR/PIF_Harbinger	2534	2393	4128	3707	3651	1915	Promoter (1-2kb)
TIR/Tc1_Mariner	1140	1711	2442	1677	1192	2408	Promoter (1-2kb)
ambiguous	6245	7521	8401	12011	15890	15713	Promoter (<=1kb)
LTR/Copia	15627	14531	18156	17129	24232	23538	Promoter (<=1kb)
LTR/Gypsy	19599	10092	18932	16977	53639	20256	Promoter (<=1kb)
LTR/unknown	10196	9232	13944	12696	26942	22265	Promoter (<=1kb)
nonTE	1735761	1385870	1412643	1465370	3050640	2521974	Promoter (<=1kb)
nonTIR/Helitron	1675	1950	2316	1882	5011	3173	Promoter (<=1kb)
TIR/CACTA	9811	9964	11368	13498	16920	19041	Promoter (<=1kb)
TIR/hAT	18838	18390	22420	24681	30832	27974	Promoter (<=1kb)
TIR/Mutator	50979	57597	69415	70246	127388	104746	Promoter (<=1kb)
TIR/PIF_Harbinger	1974	2037	3661	2016	5922	4115	Promoter (<=1kb)
TIR/Tc1_Mariner	1627	1571	2452	2771	4218	2364	Promoter (<=1kb)
ambiguous	3638	740	2860	1347	2885	1303	Intron
LTR/Copia	8711	4843	12610	6834	7002	4819	Intron
LTR/Gypsy	10624	2151	15917	2684	3819	1939	Intron
LTR/unknown	6546	1996	10225	3209	3326	3839	Intron
nonTE	426908	257325	367036	228944	240812	207370	Intron
nonTIR/Helitron	420	344	484	219	719	240	Intron
TIR/CACTA	2168	1634	3689	1589	1526	1143	Intron
TIR/hAT	4932	2280	4520	3985	4274	2177	Intron
TIR/Mutator	17247	7960	20611	9085	10818	8206	Intron
TIR/PIF_Harbinger	285	492	488	122	360	209	Intron
TIR/Tc1_Mariner	1136	321	760	177	114	681	Intron
ambiguous	0	0	0	0	0	27	Exon
LTR/Copia	120	29	0	384	356	41	Exon
LTR/Gypsy	610	29	189	44	361	39	Exon
LTR/unknown	0	33	71	97	0	0	Exon
nonTE	171149	115735	89943	66211	39707	37953	Exon
nonTIR/Helitron	61	0	0	0	0	0	Exon
TIR/CACTA	554	694	394	190	122	181	Exon
TIR/hAT	0	0	261	48	0	31	Exon
TIR/Mutator	704	275	712	135	197	588	Exon
TIR/PIF_Harbinger	41	202	0	0	0	0	Exon
TIR/Tc1_Mariner	130	0	239	29	0	0	Exon
ambiguous	2197	1372	3049	3740	3224	1675	Downstream (2-3kb)
LTR/Copia	4842	2337	4834	4227	3426	3366	Downstream (2-3kb)
LTR/Gypsy	6888	5399	10917	7790	10225	5766	Downstream (2-3kb)
LTR/unknown	4677	4933	7671	5637	5782	5922	Downstream (2-3kb)
nonTE	110669	81115	139532	104307	153243	110966	Downstream (2-3kb)
nonTIR/Helitron	178	270	210	110	0	116	Downstream (2-3kb)
TIR/CACTA	2113	1588	1814	2208	1401	1821	Downstream (2-3kb)
TIR/hAT	1217	1611	2694	2475	2520	2854	Downstream (2-3kb)
TIR/Mutator	6912	6014	10729	8514	6755	5892	Downstream (2-3kb)
TIR/PIF_Harbinger	444	585	211	714	359	520	Downstream (2-3kb)
TIR/Tc1_Mariner	120	237	216	183	597	255	Downstream (2-3kb)
ambiguous	1423	713	3088	2904	1409	1451	Downstream (1-2kb)
LTR/Copia	2197	1751	4633	2631	3500	2573	Downstream (1-2kb)
LTR/Gypsy	3318	4330	5346	4873	5960	5770	Downstream (1-2kb)
LTR/unknown	2554	3211	4471	4978	3371	3872	Downstream (1-2kb)
nonTE	109596	84287	126157	103121	178086	135528	Downstream (1-2kb)
nonTIR/Helitron	184	295	240	359	197	236	Downstream (1-2kb)
TIR/CACTA	900	1579	1336	1590	1711	890	Downstream (1-2kb)
TIR/hAT	1663	1798	2630	2792	3022	2117	Downstream (1-2kb)
TIR/Mutator	5832	5456	8426	8478	8114	6199	Downstream (1-2kb)
TIR/PIF_Harbinger	263	109	495	320	108	531	Downstream (1-2kb)
TIR/Tc1_Mariner	218	161	321	61	522	0	Downstream (1-2kb)
ambiguous	1102	1413	1397	1232	1810	1679	Downstream (<1kb)
LTR/Copia	1555	2780	2819	2806	5168	4242	Downstream (<1kb)
LTR/Gypsy	1633	1832	2508	2322	2912	3667	Downstream (<1kb)
LTR/unknown	1152	2309	1313	2510	4788	3289	Downstream (<1kb)
nonTE	133547	109199	144504	135228	251870	200871	Downstream (<1kb)
nonTIR/Helitron	111	21	293	526	58	563	Downstream (<1kb)
TIR/CACTA	583	1239	1648	1638	1943	2153	Downstream (<1kb)
TIR/hAT	1442	2449	2705	2601	3679	2764	Downstream (<1kb)
TIR/Mutator	5758	5955	7247	7099	14346	10367	Downstream (<1kb)
TIR/PIF_Harbinger	249	21	602	147	310	164	Downstream (<1kb)
TIR/Tc1_Mariner	248	21	62	284	102	306	Downstream (<1kb)
ambiguous	401460	141620	501606	226949	220018	108306	Distal Intergenic
LTR/Copia	231758	150300	319684	210444	160258	119557	Distal Intergenic
LTR/Gypsy	2415471	476547	3037209	771683	1349528	388983	Distal Intergenic
LTR/unknown	1028270	306561	1369011	478753	625067	263867	Distal Intergenic
nonTE	6231903	3170833	7953171	4306678	5730585	3556923	Distal Intergenic
nonTIR/Helitron	10057	9140	14243	11953	7692	9899	Distal Intergenic
TIR/CACTA	119544	99014	159750	137319	77292	77011	Distal Intergenic
TIR/hAT	55829	47991	96892	70424	69068	51090	Distal Intergenic
TIR/Mutator	418692	304355	554048	444781	257453	229376	Distal Intergenic
TIR/PIF_Harbinger	50335	30873	59832	43400	26998	22102	Distal Intergenic
TIR/Tc1_Mariner	27812	18395	31461	25324	12357	10042	Distal Intergenic
ambiguous	0	0	0	0	0	0	5' UTR
LTR/Copia	0	0	0	0	0	0	5' UTR
LTR/Gypsy	0	66	0	29	0	0	5' UTR
LTR/unknown	0	0	0	0	0	0	5' UTR
nonTE	0	217	0	1614	344	689	5' UTR
nonTIR/Helitron	0	0	0	0	0	0	5' UTR
TIR/CACTA	0	0	0	0	0	0	5' UTR
TIR/hAT	0	0	0	0	0	0	5' UTR
TIR/Mutator	0	0	0	0	41	0	5' UTR
TIR/PIF_Harbinger	0	0	0	0	0	0	5' UTR
TIR/Tc1_Mariner	0	0	0	0	27	0	5' UTR
ambiguous	0	0	0	21	985	361	3' UTR
LTR/Copia	0	821	0	680	2226	1141	3' UTR
LTR/Gypsy	0	269	0	289	1637	935	3' UTR
LTR/unknown	0	136	0	565	213	1432	3' UTR
nonTE	0	126153	0	120875	194158	151249	3' UTR
nonTIR/Helitron	0	0	0	30	82	385	3' UTR
TIR/CACTA	0	268	0	105	417	1038	3' UTR
TIR/hAT	0	535	0	505	720	489	3' UTR
TIR/Mutator	0	2453	0	2408	5276	4352	3' UTR
TIR/PIF_Harbinger	0	41	0	105	187	230	3' UTR
TIR/Tc1_Mariner	0	0	0	257	301	253	3' UTR

## Sheet: TableS15
Supplementary Table 15. Mapping summary of RNA-seq data
Sample	Species/Accession	Condition	Raw read pairs	Trimmed&filtered	%Trimmed&filtered	Individual-ref	Individual-ref Mapped	Individual-ref %Mapped	D5-ref	D5-ref Mapped	D5 Reference %Mapped	AD1-ref	AD1-ref Mapped	AD1-ref %Mapped
SD5-A2-S1	G. arboreum	short day 5pm	9584293	9583684	0.999936	A2_WHU_v1	8266164	0.862525	pseudo-A2	8239403	0.859732	AD1_UTX_v2.1	6063101	0.632648
SD5-A2-S4	G. arboreum	short day 5pm	9299501	9298993	0.999945	A2_WHU_v1	8106258	0.871735	pseudo-A2	8067178	0.867532	AD1_UTX_v2.1	5987305	0.643866
SD5-A2-S5	G. arboreum	short day 5pm	10649994	10649254	0.999931	A2_WHU_v1	9332006	0.876306	pseudo-A2	9282152	0.871625	AD1_UTX_v2.1	6811054	0.63958
SD5-A2xD5-S1	G. arboreum x G. raimondii	short day 5pm	10886027	10885340	0.999937	A2_WHU + D5	9041995	0.830658	pseudo-A2D5	9409161	0.864388	AD1_UTX_v2.1	6432641	0.590945
SD5-A2xD5-S2	G. arboreum x G. raimondii	short day 5pm	10882962	10882069	0.999918	A2_WHU + D5	8961411	0.823502	pseudo-A2D5	9503441	0.873312	AD1_UTX_v2.1	6398000	0.58794
SD5-A2xD5-S3	G. arboreum x G. raimondii	short day 5pm	10875560	10874935	0.999943	A2_WHU + D5	8752633	0.804845	pseudo-A2D5	9330192	0.857954	AD1_UTX_v2.1	6432878	0.591533
SD5-D5-S1	G. raimondii	short day 5pm	11138118	11137547	0.999949	D5_JGI_v2_a2.1	9985199	0.896535	D5	9909400	0.889729	AD1_UTX_v2.1	6274259	0.563343
*SD5-D5-S2	G. raimondii	short day 5pm	14640768	14639978	0.999946	D5_JGI_v2_a2.1	12370904	0.845008	D5	10210530	0.697442	AD1_UTX_v2.1	11896487	0.812603
SD5-D5-S3	G. raimondii	short day 5pm	10655284	10654723	0.999947	D5_JGI_v2_a2.1	9595957	0.900629	D5	9521319	0.893624	AD1_UTX_v2.1	6150293	0.577236
SD5-Maxxa-S1	G. hirsutum	short day 5pm	11459858	11459076	0.999932	AD1_UTX_v2.1	9985497	0.871405	pseudo-AtDt	9676084	0.844404	AD1_UTX_v2.1	10049696	0.877008
SD5-Maxxa-S2	G. hirsutum	short day 5pm	9989798	9989095	0.99993	AD1_UTX_v2.1	8761399	0.877096	pseudo-AtDt	8481541	0.84908	AD1_UTX_v2.1	8835779	0.884542
SD5-Maxxa-S3	G. hirsutum	short day 5pm	9861108	9860484	0.999937	AD1_UTX_v2.1	8356466	0.84747	pseudo-AtDt	8122294	0.823722	AD1_UTX_v2.1	8436953	0.855633
* Excluded due to labeling mistake

## Sheet: TableS16-18
Supplementary Table 16. Analysis of expression asymmetry relative to diploids
Reference Genome	Consistent				D5-ref (37,223 genes)				D5-ref (22,889 Orthologous groups)				AD1-ref (22,889 Orthologous groups)				Individual-ref (22,889 Orthologous groups)
<1 vs 2>	AD1 vs A2	AD1 vs D5	F1 vs A2	F1 vs D5	AD1 vs A2	AD1 vs D5	F1 vs A2	F1 vs D5	AD1 vs A2	AD1 vs D5	F1 vs A2	F1 vs D5	AD1 vs A2	AD1 vs D5	F1 vs A2	F1 vs D5	AD1 vs A2	AD1 vs D5	F1 vs A2	F1 vs D5
Number
1<2	1070	620	1343	662	3437	2552	3050	1589	2185	1117	2384	1004	1739	1391	1811	1169	2047	1112	2075	1227
1=2	14935	17623	15813	18302	29883	32115	29733	32631	18622	20339	18223	20181	17189	18592	17801	19491	17753	20424	17802	19848
1>2	1552	980	1777	1173	3903	2556	4440	3003	2082	1433	2272	1704	3961	2906	3277	2229	3089	1353	3012	1814
Percentage
1<2	0.0467473	0.0270872	0.0586745	0.0289222	0.0923354	0.0685598	0.0819386	0.0426887	0.0954607	0.0488007	0.104155	0.0438639	0.0759754	0.0607715	0.079121	0.0510726	0.0894316	0.0485823	0.0906549	0.0536065
1=2	0.652497	0.769933	0.690856	0.799598	0.80281	0.862773	0.79878	0.876635	0.813579	0.888593	0.796147	0.88169	0.750972	0.812268	0.77771	0.851544	0.775613	0.892306	0.777754	0.867141
1>2	0.0678055	0.0428153	0.0776355	0.0512473	0.104855	0.0686672	0.119281	0.0806759	0.0909607	0.0626065	0.0992617	0.0744462	0.173053	0.126961	0.143169	0.097383	0.134956	0.0591114	0.131592	0.079252
Asymmetry towards		TRUE		TRUE		TRUE		TRUE		TRUE		TRUE		TRUE		TRUE		TRUE		TRUE
Proportion of consist DE									0.614483	0.627451	0.670103	0.677622	0.46	0.372353	0.613208	0.540024	0.510514	0.649087	0.613328	0.60342
Supplementary Table 17. Test of additivity hypothesis
Reference Genome	Consistent		D5-ref (37,223 genes)		D5-ref (22,889 Orthologous groups)		AD1-ref (22,889 Orthologous groups)		Individual-ref (22,889 Orthologous groups)
	AD1	F1	AD1	F1	AD1	F1	AD1	F1	AD1	F1
Number	14187	17117	37223	37223	22889	22889	22889	22889	22889	22889
ELD: A-dominant	506	537	2268	1629	1166	1092	2044	1509	1106	1220
Additivity	11900	13882	25806	27033	15799	15614	14835	16011	15210	15059
ELD: D-dominant	1006	1329	3630	3478	2370	2558	2741	2423	3078	2758
Other non-additivity	432	738	3883	3514	2776	2627	2139	2024	2687	2753
Transgressive Down	131	202	716	449	397	376	265	280	380	388
Transgressive Up	212	429	920	1120	381	622	865	642	428	711
Percentage	0.619817	0.747826
*ELD: A-dominant	0.0221067	0.0234611	0.0609301	0.0437633	0.0509415	0.0477085	0.0893005	0.0659269	0.0483202	0.0533007
Additivity	0.5199	0.606492	0.693281	0.726245	0.690244	0.682162	0.648128	0.699506	0.664511	0.657914
*ELD: D-dominant	0.0439512	0.0580628	0.0975204	0.0934369	0.103543	0.111757	0.119752	0.105859	0.134475	0.120495
Other non-additivity	0.0188737	0.0322426	0.104317	0.094404	0.121281	0.114771	0.093451	0.0884268	0.117393	0.120276
Transgressive Down	0.00572327	0.0088252	0.0192354	0.0120624	0.0173446	0.0164271	0.0115776	0.012233	0.0166019	0.0169514
Transgressive Up	0.00926209	0.0187426	0.0247159	0.0300889	0.0166456	0.0271746	0.0377911	0.0280484	0.0186989	0.031063
* More D-dominant than A-dominant cases is consistent
Supplementary Table 18. Duplicated gene expression patterns under the cis and trans analytic framework
Reference Genome		Consistent				D5-ref (37,223 genes)				D5-ref (22,889 Orthologous groups)				AD1-ref (22,889 Orthologous groups)				Individual-ref (22,889 Orthologous groups)
Regulation Pattern	Measure			Imbalance	Chi-square test			Imbalance	Chi-square test			Imbalance	Chi-square test			Imbalance	Chi-square test			Imbalance	Chi-square test
		A2/At > D5/Dt	A2/At < D5/Dt		P-value	At > Dt	At < Dt		P-value	At > Dt	At < Dt	towards	P-value	At > Dt	At < Dt	towards	P-value	At > Dt	At < Dt	towards	P-value
Diploid divergence	A	1507	1416	-	0.09234	3837	4065	D	0.010321	2514	2077	A	0	3372	3671	D	0.000367	2406	2874	D	0
HEB in F1	B	807	676	A	0.0006696	2423	2773	D	1e-06	1425	1363	-	0.240311	4141	2397	A	0	1626	2001	D	0
HEB in AD1	Bp	1550	1682	D	0.02024	3048	3270	D	0.005223	1955	1946	-	0.885424	2122	2400	D	3.6e-05	2122	2400	D	3.6e-05
		Up	Down			Up	Down			Up	Down			Up	Down			Up	Down
Hybridization	Hr	80	62	-	0.1309	609	349	Up	0	149	179	-	0.097626	680	211	Up	0	366	443	Down	0.006786
Allopolyploidy	Pr	527	628	Down	0.00296	1712	1594	Up	0.040145	869	998	Down	0.002831	1397	1424	-	0.611208	1329	1320	-	0.861186
Genome doubling	Wr	283	396	Down	1.447e-05	1264	1252	-	0.810923	666	717	-	0.170255	751	1826	Down	0	1206	1131	-	0.120799
		Total	A<0	A=0	A>0	Total	A<0	A=0	A>0	Total	A<0	A=0	A>0	Total	A<0	A=0	A>0	Total	A<0	A=0	A>0
1.Cis only	A!=0;B!=0;A=B	849	385	0	464	3194	1733	0	1461	1639	778	0	861	3805	1668	0	2137	1899	1007	0	892
2.Trans only	A!=0;B=0;A!=B	62	34	0	28	533	381	0	152	161	78	0	83	215	159	0	56	277	146	0	131
3.Cis+Trans: enhancing	A!=0;B!=0;A!=B;B*(A-B)>0	9	5	0	4	74	47	0	27	23	9	0	14	33	21	0	12	37	13	0	24
4.Cis+Trans: compensating	A!=0;B!=0;A!=B; B*(A-B)<0	8	7	0	1	104	57	0	47	35	22	0	13	193	86	0	107	119	79	0	40
5.Compensatory	A=0;B!=0;A!=B	21	0	21	0	218	0	218	0	91	0	91	0	432	0	432	0	333	0	333	0
6.Conserved	A=0;B=0;A=B	8913	0	8913	0	21209	0	21209	0	15428	0	15428	0	11259	0	11259	0	14218	0	14218	0
7.Ambiguous	other	2783	440	1881	462	11891	1847	7894	2150	5512	1190	2779	1543	6952	1737	4155	1060	6006	1629	3058	1319
																				5280	0
																				3627	0
																				4522	0

[truncated: 2 more sheets: TableS19, TableS20]
